# Supplementary material
Source: PubMed Central journal article supplement (PMC4842313)
Supplement: NIHMS738923-supplement-supp_sourcegeldata.pdf [file NIHMS738923-supplement-supp_sourcegeldata.pdf]

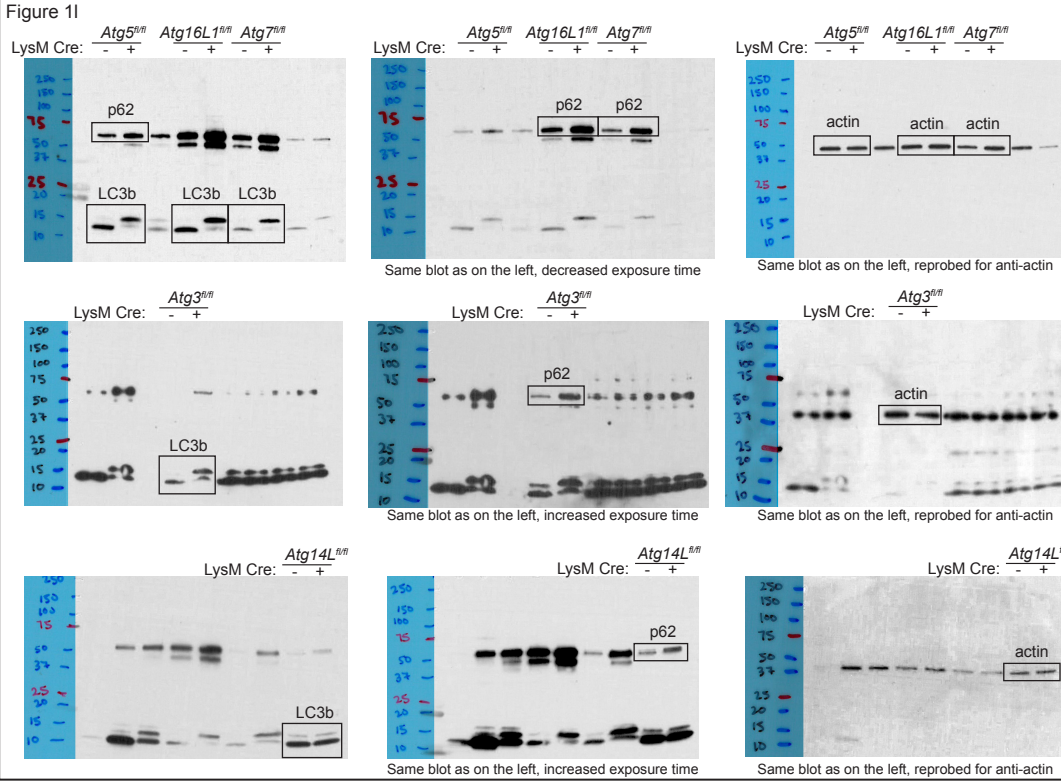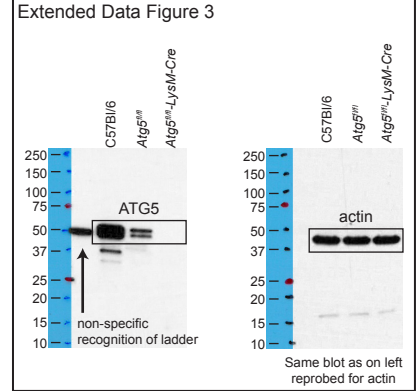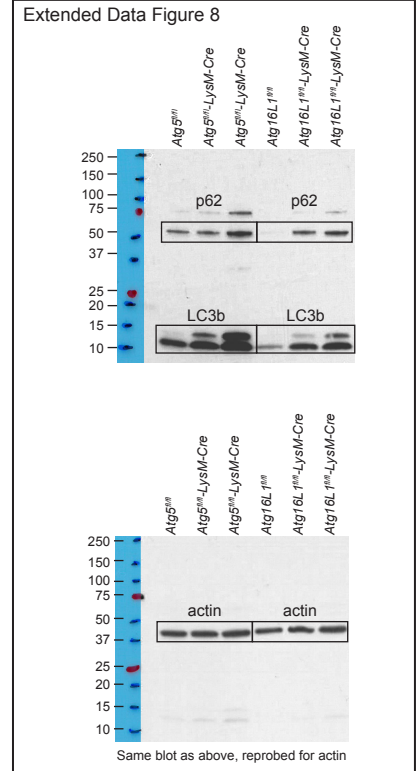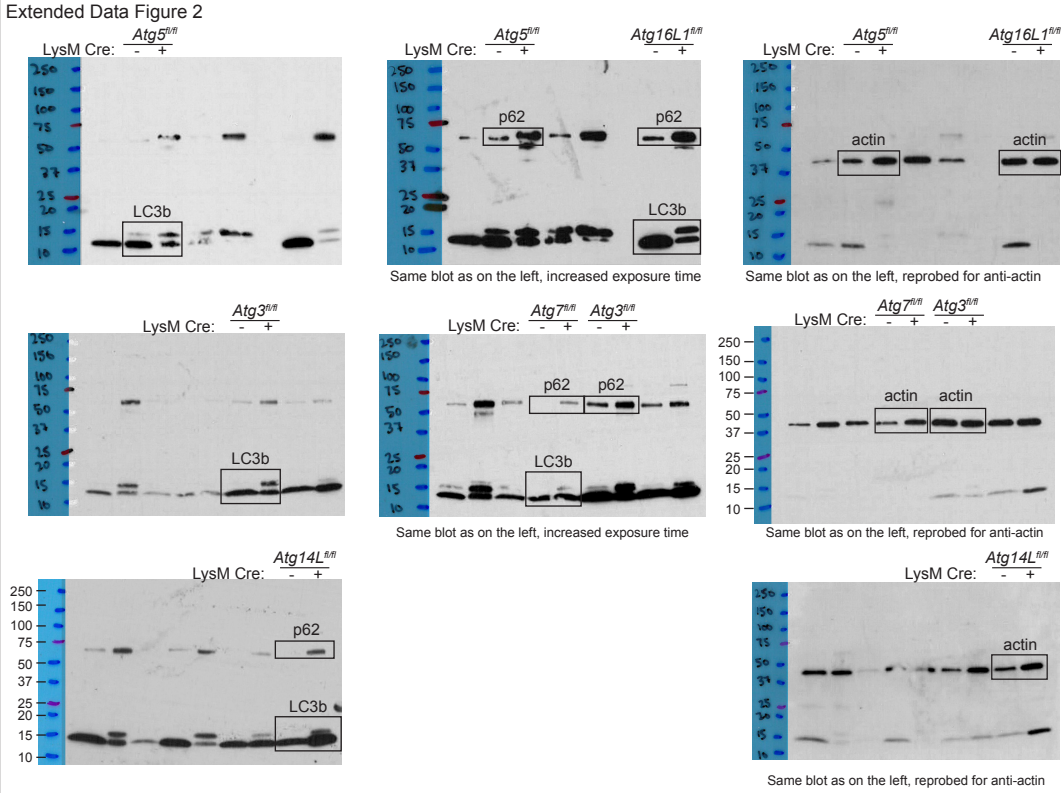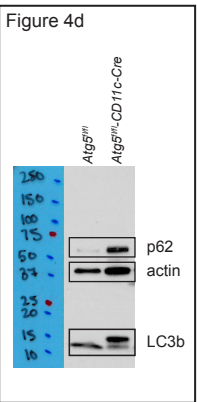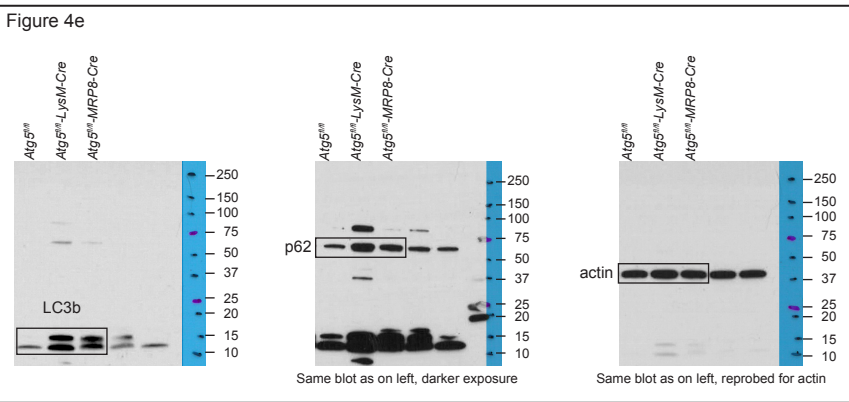

Supplementary Figure 1. Source gel data showing uncropped western blot images and ladder markers. Boxes indicate how each image was cropped for final figures.
